# Supplementary material for: Benchmark computational investigations for the basic model of the salt–water complex: NaCl(H2O) and its anion NaCl(H2O)−
Source: Royal Society of Chemistry journal article supplement (doi:10.1039/d3cp03421f), 2023-01-01
Supplement: d3cp03421f1.pdf [file d3cp03421f1.pdf]

## Supporting Information for

### **Benchmark computational investigations for the basic model of the salt-water complex: NaCl(H<sub>2</sub>O) and its anion NaCl(H<sub>2</sub>O)<sup>-</sup>**

Qi Zhang<sup>1</sup> and Jun Li<sup>1,\*</sup>

<sup>1</sup> School of Chemistry and Chemical Engineering & Chongqing Key Laboratory of Theoretical and Computational Chemistry, Chongqing University, Chongqing 401331, China

---

\*: Corresponding author, email: [jli15@cqu.edu.cn](mailto:jli15@cqu.edu.cn) (JL)

## S1. The principle of the IGMH method

In the IMGH analysis,<sup>1</sup> the interaction regions of different intensities are shown by equivalent surfaces with different  $\delta g$  function values, and  $\text{sign}(\lambda_2)\rho$  is used as the mapping function to visually distinguish the types of interactions, in which  $\rho$  is the electron density and  $\lambda_2$  is the second eigenvalue of the Hessian matrix of  $\rho$ . The  $\delta g$  function is given by the following equation in the general three-dimensional case,

$$\delta g(\mathbf{r}) = g^{\text{IGMH}}(\mathbf{r}) - g(\mathbf{r}) \quad (1)$$

with

$$g(\mathbf{r}) = \left| \sum_i \nabla \rho_i^{\text{Hirsh}}(\mathbf{r}) \right| \quad (2)$$

$$g^{\text{IGMH}}(\mathbf{r}) = \sum_i \left| \nabla \rho_i^{\text{Hirsh}}(\mathbf{r}) \right| \quad (3)$$

where  $g$  represents gradient, which is the sum of atomic electron density gradient;  $r$  denotes Cartesian coordinate vector, and  $\rho_i^{\text{Hirsh}}$  is the electron density of the  $i$  atom, obtained from the actual electron density of the system by means of the Hirshfeld atomic space division;  $g^{\text{IGMH}}$  is the IGMH-type electron density gradient, which is equal to the sum of the absolute values of the electron density gradient of atoms. At the equilibrium structure of the molecule, the greater the density overlap between atoms, the higher the  $\delta g$  peak and the stronger the interaction.

In IGMH,  $\delta g^{\text{inter}}$  and  $\delta g^{\text{intra}}$  are defined to exhibit specific inter-fragment and intra-fragment interactions:

$$\delta g^{\text{inter}}(\mathbf{r}) = g^{\text{IGMH,inter}}(\mathbf{r}) - g^{\text{inter}}(\mathbf{r}) \quad (4)$$

$$\delta g^{\text{intra}}(\mathbf{r}) = \delta g(\mathbf{r}) - \delta g^{\text{inter}}(\mathbf{r}) \quad (5)$$

Here  $g^{\text{inter}}$  is the amplitude obtained by superimposing the density gradients of all fragments,  $g^{\text{IGMH,inter}}$  is the sum of the amplitudes of the density gradients of all fragments, and their specific expression take the form:

$$g^{\text{inter}}(\mathbf{r}) = \left| \sum_A \sum_{i \in A} \nabla \rho_i^{\text{Hirsh}}(\mathbf{r}) \right| \quad (6)$$

$$g^{\text{IGMH,inter}}(\mathbf{r}) = \sum_A \left| \sum_{i \in A} \nabla \rho_i^{\text{Hirsh}}(\mathbf{r}) \right|, \quad (7)$$

where  $A$  stands for the sum running over all fragments with  $i$  for all atoms in the corresponding fragments.

**Table S1.** Geometry of the A1 isomer of neutral NaCl(H<sub>2</sub>O) optimized at different levels.

|                       |    | X        | Y        | Z        |
|-----------------------|----|----------|----------|----------|
| CCSD(T)-F12a/AVTZ     | O  | 1.64015  | -0.80427 | -0.04861 |
|                       | H  | 2.17123  | -1.56144 | 0.19735  |
|                       | H  | 0.70122  | -1.09054 | -0.02683 |
|                       | Na | 0.62287  | 1.25900  | 0.00894  |
|                       | Cl | -1.33814 | -0.27675 | 0.00813  |
| B2PLYP-D3(BJ)/AVTZ    | O  | 1.63610  | -0.79350 | -0.02990 |
|                       | H  | 2.18240  | -1.55344 | 0.17688  |
|                       | H  | 0.69639  | -1.08881 | -0.01444 |
|                       | Na | 0.62821  | 1.22657  | 0.00546  |
|                       | Cl | -1.34576 | -0.26482 | 0.00098  |
| B3LYP-D3(BJ)/AVTZ     | O  | 1.64255  | -0.78054 | -0.02453 |
|                       | H  | 2.20279  | -1.54070 | 0.14477  |
|                       | H  | 0.70382  | -1.08535 | -0.01225 |
|                       | Na | 0.62461  | 1.21533  | 0.00451  |
|                       | Cl | -1.34810 | -0.26461 | 0.00083  |
| MP2/AVTZ              | O  | 1.61046  | -0.84142 | -0.04490 |
|                       | H  | 2.09724  | -1.60645 | 0.26904  |
|                       | H  | 0.65367  | -1.08415 | -0.02157 |
|                       | Na | 0.65138  | 1.25718  | 0.00813  |
|                       | Cl | -1.34116 | -0.25923 | 0.00131  |
| DSDPBEP86-D3(BJ)/AVTZ | O  | 1.62937  | -0.80648 | -0.04142 |
|                       | H  | 2.15068  | -1.55727 | 0.24794  |
|                       | H  | 0.68391  | -1.08393 | -0.02150 |
|                       | Na | 0.63075  | 1.23535  | 0.00747  |
|                       | Cl | -1.34163 | -0.26446 | 0.00134  |
| M062X-D3/AVTZ         | O  | 1.64699  | -0.75906 | -0.00002 |
|                       | H  | 2.24698  | -1.50515 | 0.00011  |
|                       | H  | 0.72844  | -1.10326 | -0.00001 |
|                       | Na | 0.60951  | 1.20306  | 0.00000  |
|                       | Cl | -1.34447 | -0.26781 | 0.00000  |
| LC- $\omega$ PBE/AVTZ | O  | 1.63170  | -0.78157 | -0.00001 |
|                       | H  | 2.18728  | -1.56053 | 0.00004  |
|                       | H  | 0.69140  | -1.07262 | -0.00000 |
|                       | Na | 0.61584  | 1.22169  | 0.00000  |
|                       | Cl | -1.33567 | -0.26782 | 0.00000  |

**Table S2.** Geometry of the A2 isomer of neutral NaCl(H<sub>2</sub>O) optimized at different levels.

|                       |    | X        | Y        | Z        |
|-----------------------|----|----------|----------|----------|
| CCSD(T)-F12a/AVTZ     | O  | 0.00092  | 0.01996  | 0.00242  |
|                       | H  | -0.00193 | -0.02316 | 0.95845  |
|                       | H  | 0.93996  | 0.01360  | -0.28431 |
|                       | Na | -0.26057 | 0.79758  | -2.14752 |
|                       | Cl | 2.20201  | 0.44313  | -2.02932 |
| B2PLYP-D3(BJ)/AVTZ    | O  | -1.63610 | -0.79350 | -0.02989 |
|                       | H  | -2.18240 | -1.55345 | 0.17686  |
|                       | H  | -0.69639 | -1.08881 | -0.01444 |
|                       | Na | -0.62821 | 1.22657  | 0.00546  |
|                       | Cl | 1.34576  | -0.26482 | 0.00098  |
| B3LYP-D3(BJ)/AVTZ     | O  | -1.64255 | -0.78054 | -0.02453 |
|                       | H  | -2.20279 | -1.54070 | 0.14476  |
|                       | H  | -0.70382 | -1.08535 | -0.01225 |
|                       | Na | -0.62461 | 1.21533  | 0.00451  |
|                       | Cl | 1.34810  | -0.26461 | 0.00083  |
| MP2/AVTZ              | O  | -1.61046 | -0.84142 | -0.04489 |
|                       | H  | -2.09725 | -1.60646 | 0.26900  |
|                       | H  | -0.65367 | -1.08415 | -0.02157 |
|                       | Na | -0.65138 | 1.25718  | 0.00813  |
|                       | Cl | 1.34116  | -0.25923 | 0.00131  |
| DSDPBEP86-D3(BJ)/AVTZ | O  | -1.62937 | -0.80648 | -0.04142 |
|                       | H  | -2.15068 | -1.55727 | 0.24794  |
|                       | H  | -0.68391 | -1.08393 | -0.02150 |
|                       | Na | -0.63075 | 1.23535  | 0.00747  |
|                       | Cl | 1.34163  | -0.26446 | 0.00134  |
| M062X-D3/AVTZ         | O  | -1.64699 | -0.75906 | -0.00002 |
|                       | H  | -2.24698 | -1.50515 | 0.00011  |
|                       | H  | -0.72844 | -1.10326 | -0.00001 |
|                       | Na | -0.60951 | 1.20306  | 0.00000  |
|                       | Cl | 1.34447  | -0.26781 | 0.00000  |
| LC- $\omega$ PBE/AVTZ | O  | -1.63170 | -0.78157 | -0.00001 |
|                       | H  | -2.18728 | -1.56053 | 0.00004  |
|                       | H  | -0.69140 | -1.07262 | -0.00000 |
|                       | Na | -0.61584 | 1.22169  | 0.00000  |
|                       | Cl | 1.33567  | -0.26782 | 0.00000  |

**Table S3.** Geometry of the B isomer of neutral NaCl(H<sub>2</sub>O) optimized at different levels.

|                       |    | X        | Y        | Z        |
|-----------------------|----|----------|----------|----------|
| CCSD(T)-F12a/AVTZ     | O  | 0.00009  | -0.04063 | 2.96637  |
|                       | H  | 0.00004  | -0.84080 | 3.50007  |
|                       | H  | 0.00066  | 0.68348  | 3.59922  |
|                       | Na | -0.00019 | 0.07065  | 0.53810  |
|                       | Cl | 0.00006  | -0.02300 | -1.88945 |
| B2PLYP-D3(BJ)/AVTZ    | O  | -0.00134 | 2.77817  | 0.00000  |
|                       | H  | -0.76795 | 3.36080  | 0.00000  |
|                       | H  | 0.76455  | 3.36176  | 0.00000  |
|                       | Na | 0.00000  | 0.43073  | 0.00000  |
|                       | Cl | 0.00083  | -1.98152 | 0.00000  |
| B3LYP-D3(BJ)/AVTZ     | O  | -0.00025 | 2.73844  | 0.00000  |
|                       | H  | -0.76750 | 3.31982  | 0.00000  |
|                       | H  | 0.76686  | 3.32000  | 0.00000  |
|                       | Na | 0.00000  | 0.43904  | 0.00000  |
|                       | Cl | 0.00016  | -1.96334 | 0.00000  |
| MP2/AVTZ              | O  | -0.00007 | 2.84288  | 0.00000  |
|                       | H  | -0.76387 | 3.43090  | 0.00000  |
|                       | H  | 0.76369  | 3.43095  | 0.00000  |
|                       | Na | 0.00000  | 0.42295  | 0.00000  |
|                       | Cl | 0.00004  | -2.01514 | 0.00000  |
| DSDPBEP86-D3(BJ)/AVTZ | O  | 0.00004  | 2.80208  | 0.00000  |
|                       | H  | -0.76566 | 3.38696  | 0.00000  |
|                       | H  | 0.76575  | 3.38694  | 0.00000  |
|                       | Na | 0.00000  | 0.42495  | 0.00000  |
|                       | Cl | -0.00002 | -1.99206 | 0.00000  |
| M062X-D3/AVTZ         | O  | 0.00001  | 2.71828  | 0.00000  |
|                       | H  | -0.76630 | 3.29779  | 0.00000  |
|                       | H  | 0.76632  | 3.29778  | 0.00000  |
|                       | Na | 0.00000  | 0.43788  | 0.00000  |
|                       | Cl | -0.00001 | -1.9505  | 0.00000  |
| LC- $\omega$ PBE/AVTZ | O  | -0.00006 | 2.74775  | 0.00000  |
|                       | H  | -0.76663 | 3.32615  | 0.00000  |
|                       | H  | 0.76648  | 3.32619  | 0.00000  |
|                       | Na | 0.00000  | 0.42972  | 0.00000  |
|                       | Cl | 0.00004  | -1.96243 | 0.00000  |

**Table S4.** Geometry of the A1<sup>-</sup> isomer of anion NaCl(H<sub>2</sub>O)<sup>-</sup> optimized at different levels.

|                       |    | X        | Y        | Z        |
|-----------------------|----|----------|----------|----------|
| CCSD(T)-F12a/AVTZ     | O  | -0.05757 | -1.23026 | -1.49182 |
|                       | H  | 0.79529  | -1.60089 | -1.72894 |
|                       | H  | -0.04886 | -1.19636 | -0.50899 |
|                       | Na | 0.00451  | 1.20663  | -0.92674 |
|                       | Cl | 0.00231  | -0.14821 | 1.33755  |
| B2PLYP-D3(BJ) /AVTZ   | O  | 1.53533  | -1.04438 | -0.10330 |
|                       | H  | 1.82252  | -1.39531 | 0.74466  |
|                       | H  | 0.54962  | -1.09445 | -0.07908 |
|                       | Na | -1.37507 | -0.2001  | 0.00468  |
|                       | Cl | 0.79285  | 1.29511  | 0.00739  |
| B3LYP-D3(BJ)/AVTZ     | O  | 1.54389  | -1.03520 | -0.10369 |
|                       | H  | 1.83480  | -1.36562 | 0.75278  |
|                       | H  | 0.55682  | -1.09270 | -0.08167 |
|                       | Na | -1.38094 | -0.19943 | 0.00489  |
|                       | Cl | 0.79392  | 1.28456  | 0.00684  |
| MP2/AVTZ              | O  | 1.49771  | -1.09623 | -0.10300 |
|                       | H  | 1.75390  | -1.48251 | 0.73980  |
|                       | H  | 0.50866  | -1.09493 | -0.0788  |
|                       | Na | 0.82036  | 1.32156  | 0.00830  |
|                       | Cl | -1.36872 | -0.18764 | 0.00422  |
| DSDPBEP86-D3(BJ)/AVTZ | O  | 1.53208  | -1.04843 | -0.10327 |
|                       | H  | 1.80874  | -1.39973 | 0.74789  |
|                       | H  | 0.54593  | -1.09104 | -0.08195 |
|                       | Na | 0.78514  | 1.30299  | 0.00747  |
|                       | Cl | -1.36752 | -0.20322 | 0.00459  |
| M062X-D3/AVTZ         | O  | 1.58040  | -0.99363 | -0.10354 |
|                       | H  | 1.86705  | -1.23279 | 0.78197  |
|                       | H  | 0.60368  | -1.09749 | -0.09366 |
|                       | Na | 0.74220  | 1.27451  | 0.00420  |
|                       | Cl | -1.36930 | -0.22002 | 0.00552  |
| LC- $\omega$ PBE/AVTZ | O  | 1.52936  | -1.04434 | -0.10192 |
|                       | H  | 1.80360  | -1.40017 | 0.74511  |
|                       | H  | 0.54362  | -1.07902 | -0.09345 |
|                       | Na | 0.77487  | 1.30416  | 0.00751  |
|                       | Cl | -1.35916 | -0.20658 | 0.00477  |

**Table S5.** Geometry of the A2<sup>-</sup> isomer of anion NaCl(H<sub>2</sub>O)<sup>-</sup> optimized at different levels.

|                       |    | X        | Y        | Z        |
|-----------------------|----|----------|----------|----------|
| CCSD(T)-F12a/AVTZ     | O  | -0.05703 | 1.22897  | -1.49291 |
|                       | H  | 0.79604  | 1.59916  | -1.72998 |
|                       | H  | -0.0486  | 1.19583  | -0.51006 |
|                       | Na | 0.00406  | -1.20767 | -0.92547 |
|                       | Cl | 0.00186  | 0.14912  | 1.33744  |
| B2PLYP-D3(BJ)/AVTZ    | O  | -1.53534 | -1.04439 | -0.10330 |
|                       | H  | -1.82253 | -1.39531 | 0.74466  |
|                       | H  | -0.54963 | -1.09445 | -0.07908 |
|                       | Na | -0.79284 | 1.295121 | 0.00739  |
|                       | Cl | 1.37507  | -0.20009 | 0.00468  |
| B3LYP-D3(BJ)/AVTZ     | O  | -1.54389 | -1.03520 | -0.10369 |
|                       | H  | -1.83479 | -1.36562 | 0.75277  |
|                       | H  | -0.55682 | -1.09270 | -0.08167 |
|                       | Na | -0.79393 | 1.28455  | 0.00684  |
|                       | Cl | 1.38094  | -0.19942 | 0.00489  |
| MP2/AVTZ              | O  | -1.49769 | -1.09624 | -0.10300 |
|                       | H  | -1.75391 | -1.48255 | 0.73978  |
|                       | H  | -0.50864 | -1.09494 | -0.07881 |
|                       | Na | -0.82040 | 1.32154  | 0.00830  |
|                       | Cl | 1.36873  | -0.18762 | 0.00422  |
| DSDPBEP86-D3(BJ)/AVTZ | O  | -1.53209 | -1.04843 | -0.10327 |
|                       | H  | -1.80875 | -1.39972 | 0.74790  |
|                       | H  | -0.54594 | -1.09104 | -0.08195 |
|                       | Na | -0.78512 | 1.30300  | 0.00747  |
|                       | Cl | 1.36752  | -0.20322 | 0.00459  |
| M062X-D3/AVTZ         | O  | -1.58038 | -0.99365 | -0.10354 |
|                       | H  | -1.86700 | -1.23281 | 0.78197  |
|                       | H  | -0.60365 | -1.09748 | -0.09367 |
|                       | Na | -0.74224 | 1.27449  | 0.00420  |
|                       | Cl | 1.36931  | -0.22000 | 0.00552  |
| LC- $\omega$ PBE/AVTZ | O  | -1.52936 | -1.04434 | -0.10192 |
|                       | H  | -1.80360 | -1.40016 | 0.74511  |
|                       | H  | -0.54362 | -1.07902 | -0.09345 |
|                       | Na | -0.77487 | 1.30416  | 0.00751  |
|                       | Cl | 1.35916  | -0.20658 | 0.00477  |

**Table S6.** Geometry of the B<sup>-</sup> isomer of anion NaCl(H<sub>2</sub>O)<sup>-</sup> optimized at different levels.

|                       |    | X        | Y        | Z        |
|-----------------------|----|----------|----------|----------|
| CCSD(T)-F12a/AVTZ     | O  | -2.76960 | 0.00000  | 0.00000  |
|                       | H  | -3.37020 | 0.76419  | -0.00001 |
|                       | H  | -3.37020 | -0.76419 | -0.00001 |
|                       | Na | -0.45679 | 0.00000  | 0.00000  |
|                       | Cl | 2.04515  | 0.00000  | 0.00000  |
| B2PLYP-D3(BJ)/AVTZ    | O  | -2.74597 | 0.00000  | 0.00000  |
|                       | H  | -3.34481 | 0.76933  | 0.00000  |
|                       | H  | -3.34481 | -0.76933 | 0.00000  |
|                       | Na | -0.48670 | 0.00000  | 0.00000  |
|                       | Cl | 2.00065  | 0.00000  | 0.00000  |
| B3LYP-D3(BJ)/AVTZ     | O  | -2.72972 | 0.00000  | 0.00000  |
|                       | H  | -3.32678 | 0.77340  | 0.00000  |
|                       | H  | -3.32678 | -0.77340 | 0.00000  |
|                       | Na | -0.48938 | 0.00000  | 0.00000  |
|                       | Cl | 1.99262  | 0.00000  | 0.00000  |
| MP2/AVTZ              | O  | -2.79717 | 0.00000  | -0.09223 |
|                       | H  | -3.37349 | 0.762352 | 0.09550  |
|                       | H  | -3.37349 | -0.76235 | 0.09550  |
|                       | Na | -0.48366 | 0.00000  | 0.09155  |
|                       | Cl | 2.02615  | 0.00000  | -0.02707 |
| DSDPBEP86-D3(BJ)/AVTZ | O  | -2.75759 | 0.00000  | -0.05904 |
|                       | H  | -3.34606 | 0.765812 | 0.063884 |
|                       | H  | -3.34606 | -0.76581 | 0.063884 |
|                       | Na | -0.48252 | 0.00000  | 0.057244 |
|                       | Cl | 2.00356  | 0.00000  | -0.01677 |
| M062X-D3/AVTZ         | O  | -2.71137 | 0.00000  | 0.00000  |
|                       | H  | -3.30459 | 0.76982  | 0.00000  |
|                       | H  | -3.30459 | -0.76982 | 0.00000  |
|                       | Na | -0.484   | 0.00000  | 0.00000  |
|                       | Cl | 1.977889 | 0.00000  | 0.00000  |
| LC- $\omega$ PBE/AVTZ | O  | -2.72218 | 0.00000  | 0.00002  |
|                       | H  | -3.31931 | 0.76412  | -0.00002 |
|                       | H  | -3.31931 | -0.76412 | -0.00002 |
|                       | Na | -0.47694 | 0.00000  | -0.00002 |
|                       | Cl | 1.98014  | 0.00000  | 0.00001  |



**Table S7.** Geometry of the  $\text{Cl}^-$  isomer of anion  $\text{NaCl}(\text{H}_2\text{O})^-$  optimized at different levels.

|                       |    | X        | Y        | Z        |
|-----------------------|----|----------|----------|----------|
| CCSD(T)-F12a/AVTZ     | O  | -0.02887 | -0.61909 | -2.85438 |
|                       | H  | 0.80742  | -1.06281 | -2.70562 |
|                       | H  | -0.15934 | -0.14489 | -2.01292 |
|                       | Na | 0.01881  | -0.67647 | 2.14680  |
|                       | Cl | -0.03072 | 0.75604  | 0.02888  |
| B2PLYP-D3(BJ) /AVTZ   | O  | -2.71955 | -0.55949 | -0.00001 |
|                       | H  | -2.38221 | -1.45829 | 0.00005  |
|                       | H  | -1.89967 | -0.02535 | -0.00001 |
|                       | Na | 0.15180  | 0.84354  | 0.00000  |
|                       | Cl | 2.13252  | -0.76186 | 0.00000  |
| B3LYP-D3(BJ) /AVTZ    | O  | -2.54905 | -0.61675 | 0.00000  |
|                       | H  | -2.14997 | -1.49125 | 0.00003  |
|                       | H  | -1.77049 | -0.02067 | -0.00001 |
|                       | Na | 0.21953  | 0.99307  | 0.00000  |
|                       | Cl | 1.87098  | -0.94875 | 0.00000  |
| MP2/AVTZ              | O  | 2.77152  | -0.55230 | -0.09204 |
|                       | H  | 2.69354  | -0.98703 | 0.76105  |
|                       | H  | 1.90343  | -0.10501 | -0.16830 |
|                       | Na | -2.25530 | -0.66865 | -0.01392 |
|                       | Cl | -0.11534 | 0.75680  | 0.01745  |
| DSDPBEP86-D3(BJ)/AVTZ | O  | 2.73727  | -0.56050 | -0.07929 |
|                       | H  | 2.56111  | -1.15701 | 0.65220  |
|                       | H  | 1.89335  | -0.07137 | -0.15312 |
|                       | Na | -2.18004 | -0.72039 | -0.01670 |
|                       | Cl | -0.13954 | 0.80215  | 0.01876  |
| M062X-D3/AVTZ         | O  | ...      | ...      | ...      |
|                       | H  | ...      | ...      | ...      |
|                       | H  | ...      | ...      | ...      |
|                       | Na | ...      | ...      | ...      |
|                       | Cl | ...      | ...      | ...      |
| LC- $\omega$ PBE/AVTZ | O  | -2.82397 | -0.49617 | 0.08000  |
|                       | H  | -2.67228 | -1.10266 | -0.64584 |
|                       | H  | -1.96283 | -0.04499 | 0.16858  |
|                       | Na | 2.27385  | -0.63237 | 0.01838  |
|                       | Cl | 0.13027  | 0.71018  | -0.02147 |

**Table S8.** Geometry of the C2<sup>-</sup> isomer of anion NaCl(H<sub>2</sub>O)<sup>-</sup> optimized at different levels.

|                       |    | X        | Y        | Z        |
|-----------------------|----|----------|----------|----------|
| CCSD(T)-F12a/AVTZ     | O  | -0.04909 | 0.64558  | -2.83892 |
|                       | H  | 0.82076  | 1.03127  | -2.72468 |
|                       | H  | -0.17015 | 0.16773  | -1.99810 |
|                       | Na | 0.00795  | -0.76265 | 0.02633  |
|                       | Cl | -0.00661 | 0.67424  | 2.14215  |
| B2PLYP-D3(BJ)/AVTZ    | O  | ...      | ...      | ...      |
|                       | H  | ...      | ...      | ...      |
|                       | H  | ...      | ...      | ...      |
|                       | Na | ...      | ...      | ...      |
|                       | Cl | ...      | ...      | ...      |
| B3LYP-D3(BJ)/AVTZ     | O  | ...      | ...      | ...      |
|                       | H  | ...      | ...      | ...      |
|                       | H  | ...      | ...      | ...      |
|                       | Na | ...      | ...      | ...      |
|                       | Cl | ...      | ...      | ...      |
| MP2/AVTZ              | O  | -2.77150 | -0.55229 | -0.09204 |
|                       | H  | -2.69357 | -0.98701 | 0.76106  |
|                       | H  | -1.90344 | -0.10501 | -0.16831 |
|                       | Na | 2.25532  | -0.66863 | -0.01392 |
|                       | Cl | 0.11534  | 0.75678  | 0.01745  |
| DSDPBEP86-D3(BJ)/AVTZ | O  | -2.73728 | -0.56048 | -0.07928 |
|                       | H  | -2.56106 | -1.15715 | 0.65207  |
|                       | H  | -1.89337 | -0.07134 | -0.15309 |
|                       | Na | 2.18005  | -0.72038 | -0.01670 |
|                       | Cl | 0.13954  | 0.80215  | 0.01876  |
| M062X-D3/AVTZ         | O  | ...      | ...      | ...      |
|                       | H  | ...      | ...      | ...      |
|                       | H  | ...      | ...      | ...      |
|                       | Na | ...      | ...      | ...      |
|                       | Cl | ...      | ...      | ...      |
| LC- $\omega$ PBE/AVTZ | O  | -2.82394 | -0.49620 | -0.08001 |
|                       | H  | -2.67230 | -1.10253 | 0.64598  |
|                       | H  | -1.96280 | -0.04503 | -0.16861 |
|                       | Na | 2.27381  | -0.63240 | -0.01838 |
|                       | Cl | 0.13028  | 0.71021  | 0.02146  |

**Table S9.** Geometry of TS1 in the anion  $\text{NaCl}(\text{H}_2\text{O})^-$  isomerization reaction pathway.

|                    |    | X        | Y        | Z        |
|--------------------|----|----------|----------|----------|
| CCSD(T)-F12a/AVTZ  | O  | -2.18039 | -0.61794 | -0.10938 |
|                    | H  | -2.94662 | -0.43105 | 0.4492   |
|                    | H  | -1.75883 | -1.39496 | 0.27895  |
|                    | Na | -0.48035 | 1.05743  | 0.03113  |
|                    | Cl | 1.66939  | -0.26646 | -0.02263 |
| B2PLYP-D3(BJ)/AVTZ | O  | -2.16701 | -0.59090 | -0.10339 |
|                    | H  | -2.92951 | -0.44513 | 0.47596  |
|                    | H  | -1.71354 | -1.37089 | 0.24639  |
|                    | Na | -0.50899 | 1.04556  | 0.00622  |
|                    | Cl | 1.62224  | -0.29165 | 0.00214  |

**Table S10.** Geometry of TS2 in the anion  $\text{NaCl}(\text{H}_2\text{O})^-$  isomerization reaction pathway.

|                    |    | X        | Y        | Z        |
|--------------------|----|----------|----------|----------|
| CCSD(T)-F12a/AVTZ  | O  | 0.00000  | 1.24368  | -1.59757 |
|                    | H  | 0.73144  | 1.29856  | -0.96931 |
|                    | H  | -0.73144 | 1.29856  | -0.96932 |
|                    | Na | 0.00000  | -1.30349 | -0.82023 |
|                    | Cl | 0.00000  | 0.21017  | 1.30796  |
| B2PLYP-D3(BJ)/AVTZ | O  | -1.34346 | 1.42571  | 0.00000  |
|                    | H  | -1.33938 | 0.79603  | 0.73497  |
|                    | H  | -1.33938 | 0.79603  | -0.73497 |
|                    | Na | 1.22059  | 0.93288  | 0.00000  |
|                    | Cl | 0.00000  | -1.36820 | 0.00000  |

**Table S11.** Geometry of TS3 in the anion NaCl(H<sub>2</sub>O)<sup>-</sup> isomerization reaction pathway.

|                    |    | X        | Y        | Z        |
|--------------------|----|----------|----------|----------|
| CCSD(T)-F12a/AVTZ  | O  | 0.00000  | 0.00000  | 0.00000  |
|                    | H  | 0.00000  | 0.00000  | 0.95732  |
|                    | H  | 0.95136  | 0.00000  | -0.25610 |
|                    | Na | 0.00000  | 0.00016  | -2.4660  |
|                    | Cl | 2.51042  | 0.00012  | -1.65398 |
| B2PLYP-D3(BJ)/AVTZ | O  | 1.54137  | -0.98295 | 0.00000  |
|                    | H  | 1.84516  | -1.89285 | 0.00001  |
|                    | H  | 0.55350  | -1.03977 | 0.00000  |
|                    | Na | 0.77463  | 1.31356  | 0.00000  |
|                    | Cl | -1.36768 | -0.21488 | 0.00000  |

**Table S12.** Geometry of TS4 in the anion  $\text{NaCl}(\text{H}_2\text{O})^-$  isomerization reaction pathway.

|                    |    | X        | Y        | Z        |
|--------------------|----|----------|----------|----------|
| CCSD(T)-F12a/AVTZ  | O  | -2.27628 | 0.44472  | -0.07509 |
|                    | H  | -2.28284 | 0.65100  | 0.85908  |
|                    | H  | -1.52330 | -0.16820 | -0.22176 |
|                    | Na | 1.26392  | 1.33696  | 0.00721  |
|                    | Cl | 0.48826  | -1.08148 | 0.02742  |
| B2PLYP-D3(BJ)/AVTZ | O  | -2.26199 | 0.44910  | -0.09595 |
|                    | H  | -2.32353 | 0.63304  | 0.84465  |
|                    | H  | -1.47390 | -0.13084 | -0.15479 |
|                    | Na | 1.25041  | 1.33897  | -0.00461 |
|                    | Cl | 0.47876  | -1.10727 | 0.00756  |

**Table S13.** Geometry of TS5 in the anion  $\text{NaCl}(\text{H}_2\text{O})^-$  isomerization reaction pathway.

|                    |    | X        | Y        | Z        |
|--------------------|----|----------|----------|----------|
| CCSD(T)-F12a/AVTZ  | O  | -2.76910 | -0.53665 | 0.00037  |
|                    | H  | -2.45214 | -1.44104 | -0.00041 |
|                    | H  | -1.93750 | -0.02853 | 0.00026  |
|                    | Na | 2.27713  | -0.69664 | 0.00022  |
|                    | Cl | 0.16450  | 0.74140  | -0.00041 |
| B2PLYP-D3(BJ)/AVTZ | O  | 3.13887  | 0.00002  | 0.00012  |
|                    | H  | 2.50993  | 0.73199  | 0.00007  |
|                    | H  | 2.50995  | -0.73197 | 0.00007  |
|                    | Na | -2.62086 | 0.00002  | 0.00012  |
|                    | Cl | -0.07655 | -0.00002 | -0.00015 |

**Table S14.** Geometry of TS1' in the neutral NaCl(H<sub>2</sub>O) isomerization reaction pathway.

|                    |    | X        | Y        | Z       |
|--------------------|----|----------|----------|---------|
| CCSD(T)-F12a/AVTZ  | O  | ...      | ...      | ...     |
|                    | H  | ...      | ...      | ...     |
|                    | H  | ...      | ...      | ...     |
|                    | Na | ...      | ...      | ...     |
|                    | Cl | ...      | ...      | ...     |
| B2PLYP-D3(BJ)/AVTZ | O  | 1.92731  | 1.90188  | 0.00000 |
|                    | H  | 2.08033  | 2.85189  | 0.00000 |
|                    | H  | 2.80251  | 1.49964  | 0.00000 |
|                    | Na | 0.00000  | 0.57396  | 0.00000 |
|                    | Cl | -1.19420 | -1.52236 | 0.00000 |



**Table S15.** Geometry of TS2' in the neutral NaCl(H<sub>2</sub>O) isomerization reaction pathway.

|                    |    | X        | Y        | Z        |
|--------------------|----|----------|----------|----------|
| CCSD(T)-F12a/AVTZ  | O  | 0.00000  | 0.95081  | -1.80306 |
|                    | H  | 0.73900  | 1.26937  | -1.27008 |
|                    | H  | -0.73908 | 1.26930  | -1.27017 |
|                    | Na | 0.00000  | -1.18232 | -0.67128 |
|                    | Cl | 0.00000  | 0.26543  | 1.32121  |
| B2PLYP-D3(BJ)/AVTZ | O  | 1.98916  | -0.04787 | 0.00000  |
|                    | H  | 1.69811  | 0.49691  | 0.74363  |
|                    | H  | 1.69811  | 0.49691  | -0.74363 |
|                    | Na | 0.00000  | -1.33512 | 0.00000  |
|                    | Cl | -1.13586 | 0.82797  | 0.00000  |

**Table S16.** Geometry of TS3' in the neutral NaCl(H<sub>2</sub>O) isomerization reaction pathway.

|                    |    | X        | Y        | Z        |
|--------------------|----|----------|----------|----------|
| CCSD(T)-F12a/AVTZ  | O  | -1.59952 | -0.79648 | -0.01972 |
|                    | H  | -2.16158 | -1.56420 | -0.02992 |
|                    | H  | -0.68841 | -1.16514 | 0.07354  |
|                    | Na | -0.63550 | 1.27146  | 0.00745  |
|                    | Cl | 1.36926  | -0.21523 | -0.03133 |
| B2PLYP-D3(BJ)/AVTZ | O  | -1.65599 | -0.78700 | -0.00001 |
|                    | H  | -2.09606 | -1.63945 | 0.00001  |
|                    | H  | -0.69117 | -1.00556 | -0.00005 |
|                    | Na | -0.61133 | 1.23663  | 0.00000  |
|                    | Cl | 1.33881  | -0.27424 | 0.00000  |

**Table S17.** The harmonic frequencies of the isomers of  $\text{NaCl}(\text{H}_2\text{O})^-$  and  $\text{NaCl}(\text{H}_2\text{O})$  at different levels. The values to the right of the forward slash indicate that the harmonic frequencies were scaled by a frequency correction factor.

| species           | note                               | frequency |           |           |         |         |         |         |         |         |
|-------------------|------------------------------------|-----------|-----------|-----------|---------|---------|---------|---------|---------|---------|
|                   |                                    | v1        | v2        | v3        | v4      | v5      | v6      | v7      | v8      | v9      |
| NaCl <sup>+</sup> | CCSD(T)-F12a/AVTZ                  | 3941      | 3831      | 1646      | 266     |         |         |         |         |         |
| H <sub>2</sub> O  | b2plyp-D3(BJ)/AVTZ                 | 3924      | 3812      | 1635      | 263     |         |         |         |         |         |
|                   | b3lyp-D3(BJ)/AVTZ                  | 3899/3774 | 3796/3675 | 1627/1575 | 260/252 |         |         |         |         |         |
|                   | mp2/AVTZ                           | 3948/3789 | 3822/3668 | 1628/1563 | 262/251 |         |         |         |         |         |
|                   | dsdpbep86-D3(BJ)/AVTZ              | 3939/3928 | 3824/3814 | 1640/1636 | 269/268 |         |         |         |         |         |
| NaCl <sup>+</sup> | CCSD(T)-F12a/AVTZ                  | 3941      | 3831      | 1646      | 350     |         |         |         |         |         |
| H <sub>2</sub> O  | b2plyp-D3(BJ)/AVTZ <sup>a</sup>    | 3924      | 3812      | 1635      | 355     |         |         |         |         |         |
|                   | b3lyp-D3(BJ)/AVTZ <sup>b</sup>     | 3899/3774 | 3796/3675 | 1627/1575 | 355/344 |         |         |         |         |         |
|                   | mp2/AVTZ <sup>c</sup>              | 3948/3789 | 3822/3668 | 1628/1563 | 347/333 |         |         |         |         |         |
|                   | dsdpbep86-D3(BJ)/AVTZ <sup>d</sup> | 3939/3928 | 3824/3814 | 1640/1636 | 355/354 |         |         |         |         |         |
| A <sup>-</sup>    | CCSD(T)-F12a/AVTZ                  | 3877      | 3430      | 1654      | 783     | 379     | 290     | 246     | 182     | 150     |
|                   | b2plyp-D3(BJ)/AVTZ <sup>a</sup>    | 3848      | 3358      | 1637      | 785     | 375     | 296     | 245     | 176     | 153     |
|                   | b3lyp-D3(BJ)/AVTZ <sup>b</sup>     | 3811/3689 | 3324/3217 | 1625/1573 | 778/753 | 370/358 | 299/289 | 242/234 | 171/165 | 152/147 |
|                   | mp2/AVTZ <sup>c</sup>              | 3880/3724 | 3348/3214 | 1638/1572 | 808/775 | 388/372 | 292/280 | 248/238 | 184/177 | 145/139 |
|                   | dsdpbep86-D3(BJ)/AVTZ <sup>d</sup> | 3871/3860 | 3377/3367 | 1644/1640 | 794/792 | 376/375 | 297/296 | 250/250 | 183/183 | 155/155 |
| B <sup>-</sup>    | CCSD(T)-F12a/AVTZ                  | 3658      | 3623      | 1594      | 360     | 348     | 227     | 172     | 78      | 62      |
|                   | b2plyp-D3(BJ)/AVTZ <sup>a</sup>    | 3580      | 3536      | 1569      | 350     | 293     | 207     | 130     | 51      | 38      |
|                   | b3lyp-D3(BJ)/AVTZ <sup>b</sup>     | 3512/3399 | 3486/3375 | 1548/1498 | 350/339 | 284/275 | 204/198 | 125/121 | 49/47   | 39/38   |
|                   | mp2/AVTZ <sup>c</sup>              | 3662/3515 | 3601/3457 | 1582/1518 | 340/326 | 309/296 | 209/201 | 158/152 | 55/53   | 42/40   |
|                   | dsdpbep86-D3(BJ)/AVTZ <sup>d</sup> | 3639/3629 | 3593/3583 | 1585/1581 | 352/351 | 301/300 | 211/211 | 138/138 | 51/51   | 31/31   |
| C <sup>-</sup>    | CCSD(T)-F12a/AVTZ                  | 3894      | 3600      | 1682      | 624     | 300     | 252     | 166     | 20      | 11      |
|                   | b2plyp-D3(BJ)/AVTZ <sup>a</sup>    | 3877      | 3530      | 1670      | 629     | 325     | 249     | 168     | 17      | 8       |
|                   | b3lyp-D3(BJ)/AVTZ <sup>b</sup>     | 3848/3725 | 3490/3378 | 1661/1608 | 626/606 | 338/327 | 245/237 | 169/136 | 33/32   | 17/17   |
|                   | mp2/AVTZ <sup>c</sup>              | 3899/3742 | 3540/3398 | 1663/1596 | 646/620 | 322/309 | 250/240 | 170/163 | 37/35   | 15/14   |
|                   | dsdpbep86-D3(BJ)/AVTZ <sup>d</sup> | 3892/3881 | 3554/3545 | 1674/1669 | 633/631 | 315/314 | 255/255 | 169/169 | 29/29   | 16/16   |
| A                 | CCSD(T)-F12a/AVTZ                  | 3923      | 3474      | 1648      | 661     | 503     | 319     | 248     | 182     | 82      |
|                   | b2plyp-D3(BJ)/AVTZ <sup>a</sup>    | 3905      | 3411      | 1633      | 653     | 511     | 322     | 256     | 177     | 71      |
|                   | b3lyp-D3(BJ)/AVTZ <sup>b</sup>     | 3883/3759 | 3372/3264 | 1621/1569 | 642/621 | 513/497 | 321/311 | 258/250 | 174/169 | 58/56   |
|                   | mp2/AVTZ <sup>c</sup>              | 3917/3759 | 3399/3263 | 1635/1569 | 694/667 | 505/485 | 317/305 | 245/235 | 186/179 | 114/109 |
|                   | dsdpbep86-D3(BJ)/AVTZ <sup>d</sup> | 3917/3907 | 3423/3414 | 1641/1637 | 673/672 | 503/502 | 324/323 | 256/255 | 183/182 | 101/101 |
| B                 | CCSD(T)-F12a/AVTZ                  | 3918      | 3900      | 1664      | 358     | 342     | 227     | 204     | 32      | 16      |
|                   | b2plyp-D3(BJ)/AVTZ <sup>a</sup>    | 3902      | 3862      | 1656      | 368     | 345     | 229     | 209     | 28      | 7       |
|                   | b3lyp-D3(BJ)/AVTZ <sup>b</sup>     | 3884/3760 | 3796/3675 | 1650/1597 | 372/360 | 348/337 | 236/229 | 200/193 | 32/31   | 13/13   |
|                   | mp2/AVTZ <sup>c</sup>              | 3920/3763 | 3875/3719 | 1649/1582 | 357/342 | 337/324 | 212/204 | 202/194 | 25/24   | 9/9     |
|                   | dsdpbep86-D3(BJ)/AVTZ <sup>d</sup> | 3914/3904 | 3898/3887 | 1659/1654 | 367/366 | 341/340 | 219/219 | 210/210 | 25/25   | 4/4     |

<sup>a</sup> Since the B2PLYP-D3(BJ)/AVTZ frequency correction factor is 0.9999, which is close to 1,<sup>2</sup> and the result is rounded, the non-resonant and resonant frequencies are almost identical.

<sup>b</sup> Frequency correction factor 0.9680 for B3LYP-D3(BJ)/AVTZ.<sup>3</sup>

<sup>c</sup> Frequency correction factor of 0.9598 for MP2/AVTZ.<sup>4</sup>

<sup>d</sup> Frequency correction factor of 0.9973 for DSDPBEP86-D3BJ/AVTZ.<sup>3</sup>

**Table S18.** ADCH charge analysis for different isomers of the  $\text{NaCl}(\text{H}_2\text{O})^-$  and  $\text{NaCl}(\text{H}_2\text{O})$  complex.

| Atoms | ADCH charges                       |                                      |         |              |         |              |              |
|-------|------------------------------------|--------------------------------------|---------|--------------|---------|--------------|--------------|
|       | $\text{NaCl} + \text{H}_2\text{O}$ | $\text{NaCl}^- + \text{H}_2\text{O}$ | A       | $\text{A}^-$ | B       | $\text{B}^-$ | $\text{C}^-$ |
| O     | -0.6790                            | -0.6790                              | -0.4591 | -0.3394      | -0.4299 | -0.0064      | -0.6933      |
| 1H    | 0.3395                             | 0.3395                               | 0.3642  | 0.1092       | 0.3211  | -0.1915      | 0.3116       |
| H     | 0.3395                             | 0.3395                               | 0.0184  | 0.3318       | 0.3211  | -0.1915      | 0.2584       |
| Na    | 0.7973                             | -0.5921                              | 0.7090  | -0.6448      | 0.4626  | 0.1314       | -0.5632      |
| Cl    | -0.7973                            | -0.4079                              | -0.6325 | -0.4568      | -0.6749 | -0.7420      | -0.3135      |

Note: Structure based on B2PLYP-D3(BJ)/AVTZ level optimization, 1H in the isomer indicates the H atom away from the Cl atom. ADCH charges<sup>5</sup> were calculated using Multiwfn and the results were retained to four decimal places.

**Table S19.** Comparison between theoretical and experimental energies, adiabatic detachment energy (ADE), for different isomers (in  $\text{cm}^{-1}$ ).

|                                             | Isomer                                      | NaCl (H <sub>2</sub> O) <sup>-</sup> |                |                | NaCl (H <sub>2</sub> O) |         |          |
|---------------------------------------------|---------------------------------------------|--------------------------------------|----------------|----------------|-------------------------|---------|----------|
|                                             |                                             | A <sup>-</sup>                       | B <sup>-</sup> | C <sup>-</sup> | A1                      | A2      | B        |
| $\Delta E$                                  | Expt_1 <sup>a</sup>                         | 0                                    | 186(22)        | 481(48)        | 0                       | 123(10) | 1821(24) |
|                                             | B3LYP-D3(BJ)/def2-QZVPP <sup>a</sup>        | 0                                    | 51             | 330            | 0                       | 88      | 1604     |
|                                             | LC- $\omega$ PBE/6-311++G(d,p) <sup>b</sup> | 0                                    | 234            | 274            |                         | 0       | 1839     |
|                                             | B2PLYP-D3(BJ)/AVTZ                          | 0                                    | -44            | 186            | 0                       | 0       | 1736     |
|                                             | B3LYP-D3(BJ)/AVTZ                           | 0                                    | -42            | 240            | 0                       | 0       | 1880     |
|                                             | B3LYP-D3(BJ)/AVTZ <sup>c</sup>              | 0                                    | 798            | 18             | 0                       | 0       | 869      |
|                                             | MP2/AVTZ                                    | 0                                    | -10            | 192            | 0                       | 0       | 1620     |
|                                             | DSDPBEP86-D3(BJ)/AVTZ                       | 0                                    | -25            | 179            | 0                       | 0       | 1669     |
|                                             | CCSD(T)-F12a/AVTZ                           | 0                                    | 49             | 155            | 0                       | 3       | 1623     |
|                                             | CCSD(T)/CBS                                 | 0                                    | 37             | 133            | 0                       | 0       | 1601     |
|                                             | FPA                                         | 0                                    | -12            | 282            | 0                       | 0       | 1547     |
|                                             | ADE                                         | Expt_1 <sup>a</sup>                  | 3643(22)       | 5278(17)       |                         |         |          |
| Expt_2 <sup>b</sup>                         |                                             | 3710(81)                             | 5081(65)       |                |                         |         |          |
| B3LYP-D3(BJ)/def2-QZVPP <sup>a</sup>        |                                             | 3726                                 | 5279           |                |                         |         |          |
| LC- $\omega$ PBE/6-311++G(d,p) <sup>b</sup> |                                             |                                      |                |                |                         |         |          |
| B2PLYP-D3(BJ)/AVTZ                          |                                             | 3672                                 | 5453           |                |                         |         |          |
| B3LYP-D3(BJ)/AVTZ                           |                                             | 3692                                 | 5612           |                |                         |         |          |
| B3LYP-D3(BJ)/AVTZ <sup>c</sup>              |                                             | 4912                                 | 6186           |                |                         |         |          |
| MP2/AVTZ                                    |                                             | 3661                                 | 5290           |                |                         |         |          |
| DSDPBEP86-D3(BJ)/AVTZ                       |                                             | 3665                                 | 5359           |                |                         |         |          |
| CCSD(T)-F12a/AVTZ                           |                                             | 3637                                 | 5210           |                |                         |         |          |
| CCSD(T)/CBS                                 |                                             | 3603                                 | 5162           |                |                         |         |          |
| FPA                                         |                                             | 3670                                 | 5231           |                |                         |         |          |
| VDE                                         | Expt_1 <sup>a</sup>                         |                                      |                | 7680(200)      |                         |         |          |
|                                             | Expt_2 <sup>b</sup>                         | 4355(81)                             | 5162(65)       | 7743(65)       |                         |         |          |
|                                             | B3LYP-D3(BJ)/def2-QZVPP <sup>a</sup>        |                                      |                | 7857           |                         |         |          |
|                                             | LC- $\omega$ PBE/6-311++G(d,p) <sup>b</sup> | 4275                                 | 5323           | 7501           |                         |         |          |
|                                             | B2PLYP-D3(BJ)/AVTZ                          | 4408                                 | 5396           | 7748           |                         |         |          |
|                                             | B3LYP-D3(BJ)/AVTZ                           | 4391                                 | 5455           | 7812           |                         |         |          |
|                                             | B3LYP-D3(BJ)/AVTZ <sup>c</sup>              | 5947                                 | 6599           | 9518           |                         |         |          |
|                                             | MP2/AVTZ                                    | 4617                                 | 5387           | 7550           |                         |         |          |
|                                             | DSDPBEP86-D3(BJ)/AVTZ                       | 4415                                 | 5376           | 7631           |                         |         |          |
|                                             | CCSD(T)-F12a/AVTZ                           | 4503                                 | 5254           | 7563           |                         |         |          |
|                                             | CCSD(T)/CBS                                 | 4487                                 | 5233           | 7541           |                         |         |          |
|                                             | FPA                                         | 4822                                 | 5168           | 7954           |                         |         |          |

<sup>a</sup> denotes density generalization calculations and experimental data by Lu and Ning.<sup>6</sup>

<sup>b</sup> denotes theoretical calculations and experimental data by Hou et al.,<sup>7</sup> and the numbers in the parentheses

indicate the experimental uncertainty.

<sup>c</sup> the single point energies were calculated using the Beijing Density Function (BDF) software at the B3LYP-D3(BJ)/AVTZ level based on the structure obtained at the B3LYP-D3(BJ)/AVTZ level (Gaussian 16).

Noted that since the isomer C<sup>-</sup> cannot be obtained at the M062X-D3/aVTZ level and the A obtained by optimization at the LC- $\omega$ PBE/AVTZ level, with a structure like TS3, is a five-atom coplanar structure, which is inconsistent with the results of many previous studies, we do not consider the A and B calculation levels in the energy calculations and frequency analysis work.

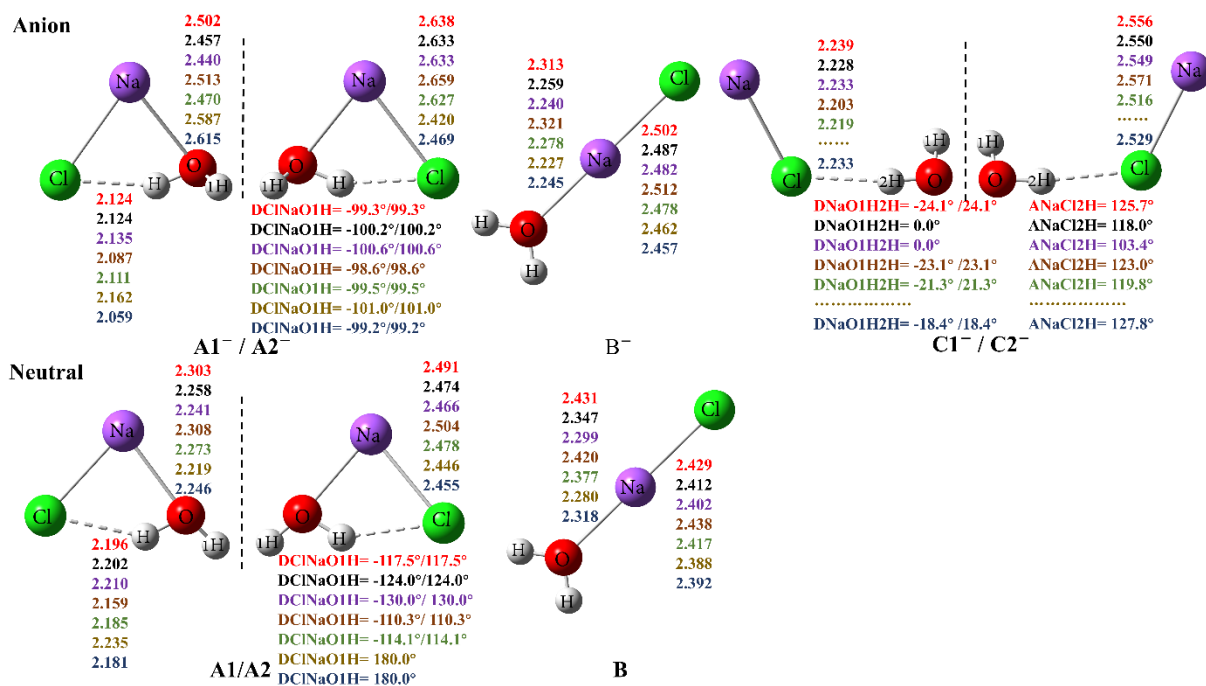

**Fig. S1** Optimized geometries for isomers of  $\text{NaCl}(\text{H}_2\text{O})^-$  and  $\text{NaCl}(\text{H}_2\text{O})$  (lengths in Å and angles in °). The seven entries are determined by CCSD(T)-F12a/aVTZ (red), B2PLYP-D3(BJ)/aVTZ (black), B3LYP-D3(BJ)/aVTZ (purple), MP2/ aVTZ (brown), DSD-PBEP86-D3(BJ)/aVTZ (green), M062X-D3/aVTZ (olive green) and LC- $\omega$ PBE/aVTZ (navy blue).



## References

1. T. Lu and Q. X. Chen, *J. Comput. Chem.*, 2022, **43**, 539-555.
2. M. K. Kesharwani, B. Brauer and J. M. L. Martin, *J. Phys. Chem. A*, 2015, **119**, 1701-1714.
3. M. K. Kesharwani, N. Sylvetsky and J. M. L. Martin, Thessaloniki, GREECE, 2017.
4. J. P. Merrick, D. Moran and L. Radom, *J. Phys. Chem. A*, 2007, **111**, 11683-11700.
5. T. Lu and F. W. Chen, *J. Theo. Comput. Chem.*, 2012, **11**, 163-183.
6. Y. Z. Lu and C. G. Ning, *J. Phys. Chem. Lett.*, 2022, **13**, 4995-5000.
7. G. L. Hou, C. W. Liu, R. Z. Li, H. G. Xu, Y. Q. Gao and W. J. Zheng, *J. Phys. Chem. Lett.*, 2017, **8**, 13-20.
